# Supplementary material for: Comparative Genomics Highlight the Importance of Lineage-Specific Gene Families in Evolutionary Divergence of the Coral Genus, Montipora
Source: Research Square preprint supplement (doi:10.21203/rs.3.rs-944849/v1), 2021-10-18
Supplement: Supplementary file 1 [file 072c1e11a84ab6bc271d4bab.docx]

Supplementary material for

***Comparative genomics highlight the importance of lineage-specific gene families in evolutionary divergence of the coral genus, Montipora***

Yuki Yoshioka1,2, Go Suzuki3, Yuna Zayasu4, Hiroshi Yamashita3 and Chuya Shinzato1

**Affiliations:**

1 Atmosphere and Ocean Research Institute, The University of Tokyo, Kashiwa, Chiba, Japan

2 Graduate School of Frontier Science, The University of Tokyo, Kashiwa, Chiba, Japan

3 Fisheries Technology Institute, Japan Fisheries Research and Education Agency, Ishigaki, Okinawa, Japan

4 Marine Genomics Unit, Okinawa Institute of Science and Technology Graduate University, Onna, Okinawa, Japan

*Corresponding author:

Chuya Shinzato ([c.shinzato@aori.u-tokyo.ac.jp](mailto:c.shinzato@aori.u-tokyo.ac.jp))

Supplementary Table p.p. 2

Supplementary Figure p.p. 3

Supplementary Data p.p. 4

**Supplementary Table**

**Supplementary Table S1.** Summary of comparison of KEGG metabolic pathways among acroporid genomes. MCR indicates the module completion ratio, calculated by GenoMaple.

**Supplementary Table S2.** IDs of gene families common to *Montipora* and *Astreopora* or restricted to *Montipora*, that are expressed during three life stages (planula larvae, metamorphosed larvae, and recruits).

**Supplementary Table S3.** IDs of gene families common to three genera (*Montipora*, *Acropora* and *Astreopora*) or common to *Montipora* and *Acropora*, that are expressed during three life stages (planula larvae, metamorphosed larvae, and recruits).

**Supplementary Table S4.** Summary of gene families significantly (Fisher’s exact test: *p* < 0.05) expanded in the *Montipora* genome compared to those of *Acropora* or *Astreopora*.

**Supplementary Table S5.** Summary of samples used for RNA-seq.

**Supplementary Table S6.** Summary of publicly available RNA-seq samples that were included for gene prediction in *Montipora* and *Astreopora*.

**Supplementary Table S7.** Summary of RNA-seq samples used for comparative transcriptomic analyses.

**Supplementary Figure**

**Supplementary Figure S1.** Summary of gene predictions for *M. cactus*, *M. efflorescens*, and *Astreopora myriophthalma*.

**Supplementary Data**

**Supplementary Data S1.** Result of orthologous clustering in Acroporidae genomes using Orthofinder.

**Supplementary Data S2.** Summary of retained scaffolds after genome assembly curation for *Montipora cactus* and *M. efflorescens*.

**Supplementary Data S3.** Gene models for *M. cactus* in GTF format.

**Supplementary Data S4.** Gene models for *M. efflorescens* in GTF format.

**Supplementary Data S5.** Gene models for *Astreopora myriophthalma* in GTF format.
