# Supplementary material for: Comparative Genomics Highlight the Importance of Lineage-Specific Gene Families in Evolutionary Divergence of the Coral Genus, Montipora
Source: Research Square preprint supplement (doi:10.21203/rs.3.rs-944849/v1), 2021-10-18
Supplement: Supplementary file 13 [file b6f0a5d3255c6fcbff8db7d9.xlsx]

## Sheet: Table2
Gene family group	Gene family ID	Expressed in early life stages of	SwissProt annotation (BLASTP, e-value cutoff: 1e-5)	Pfam domain (InterProScan, e-value cutoff: 1e-3)	Subcellular localization	Ka	Ks	Ka/Ks ratio
Common to the three genera	HOG0011297	Montipora and Acropora	G patch domain and ankyrin repeat-containing protein 1	Ankyrin repeats (3 copies) (PF12796) G-patch domain (PF01585)	Nucleus	1.02946	0.868207	1.18573
	HOG0013033	Montipora and Acropora	NA	NA	Nucleus	0.0474655	0.0169419	2.80166
	HOG0013161	Montipora and Acropora	NA	NA	Extracellular	0.0677469	0.0115074	5.88723
	HOG0013504	Montipora and Acropora	NA	NA	Extracellular	0.250122	0.146258	1.71014
	HOG0016452	Montipora and Acropora	Nucleoredoxin-like protein 2	Thioredoxin-like (PF13905)	Cytoplasm	1.04061	0.866303	1.2012
Common to Montipora and Acropora	HOG0000399	-	NA	NA	Mitochondrion	1.04494	0.829832	1.25922
	HOG0007354	Montipora and Acropora	NA	NA	Cytoplasm	0.0431713	0.01538	2.80698
	HOG0008211	Montipora and Acropora	E3 ubiquitin-protein ligase TRIM71	RING-type zinc-finger (PF13445) B-box zinc finger (PF00643)	Nucleus	1.02988	0.901833	1.14199
	HOG0008701	Montipora and Acropora	Collagen alpha-1(V) chain	Fibrillar collagen C-terminal domain (PF01410)	Extracellular	0.0868943	0.0315939	2.75035
	HOG0018764	Montipora and Acropora	Histamine H2 receptor	7 transmembrane receptor (rhodopsin family) (PF00001)	Cell membrane	1.03386	0.896216	1.15358
Restricted to Montipora	HOG0000410	Montipora*1	NA	NA	Cytoplasm	1.0489	0.858182	1.22224
	HOG0006069	Montipora*1	NA	NA	Cytoplasm	1.06207	0.789879	1.34459
	HOG0025744	Montipora*1	NA	NA	Cytoplasm	1.04814	0.846526	1.23816
	HOG0025248	Montipora*1	NA	NA	Golgi apparatus	1.06112	0.837214	1.26744
	HOG0025123	Montipora*1	NA	NA	Mitochondrion	1.03568	0.871894	1.18785
	HOG0025167	Montipora*1	NA	NA	Mitochondrion	1.05341	0.81252	1.29647
	HOG0025503	Montipora*1	NA	NA	Mitochondrion	1.06094	0.794999	1.33451
	HOG0025176	Montipora*1	NA	NA	Plastid	1.07662	0.736763	1.46128
	HOG0025663	Montipora*1	NA	NA	Lysosome/Vacuole	1.0435	0.883964	1.18048
	HOG0023383	Montipora*2	NA	NA	Cytoplasm	1.0506	0.86614	1.21297
	HOG0024846	Montipora*2	NA	NA	Cytoplasm	0.157342	0.0545721	2.8832
	HOG0025044	Montipora*2	NA	NA	Cytoplasm	1.04722	0.8635	1.21276
	HOG0025199	Montipora*2	NA	NA	Cytoplasm	1.04978	0.833375	1.25967
	HOG0024900	Montipora*2	NA	NA	Endoplasmic reticulum	0.0724661	0.0303483	2.38782
	HOG0025608	Montipora*2	NA	NA	Endoplasmic reticulum	1.05623	0.836453	1.26275
	HOG0024879	Montipora*2	NA	NA	Extracellular	1.04481	0.820572	1.27328
	HOG0024911	Montipora*2	NA	NA	Extracellular	1.08591	0.764205	1.42097
	HOG0024765	Montipora*2	NA	NA	Mitochondrion	1.06916	0.745005	1.43511
	HOG0025496	Montipora*2	NA	NA	Mitochondrion	1.03657	0.886546	1.16922
	HOG0025423	Montipora*2	NA	NA	Mitochondrion	1.05678	0.799324	1.32209
	HOG0025535	Montipora*2	Integrase/recombinase xerD homolog	NA	Mitochondrion	1.04223	0.880029	1.18431
	HOG0025606	Montipora*2	NA	NA	Mitochondrion	1.05418	0.833955	1.26408
	HOG0024806	Montipora*2	NA	Zinc knuckle (PF00098)	Nucleus	1.0438	0.876216	1.19126
	HOG0024834	Montipora*2	NA	NA	Nucleus	1.04457	0.853951	1.22323
	HOG0024972	Montipora*2	NA	NA	Nucleus	1.06879	0.737384	1.44943
	HOG0025048	Montipora*2	NA	NA	Nucleus	1.0465	0.828206	1.26357
	HOG0025616	Montipora*2	NA	NA	Nucleus	1.07293	0.838674	1.27932
	HOG0024996	-	NA	NA	Cell membrane	0.827813	0.407974	2.02908
	HOG0024975	-	NA	NA	Endoplasmic reticulum	1.02887	0.884795	1.16284
	HOG0025445	-	TNF receptor-associated factor 6	TRAF-type zinc finger (PF02176)	Nucleus	0.0942421	0.0194248	4.85163
*1: Expressed at least one early life stages
*2: Expressed at all three early life stages
