# Supplementary material for: Comparative Genomics Highlight the Importance of Lineage-Specific Gene Families in Evolutionary Divergence of the Coral Genus, Montipora
Source: Research Square preprint supplement (doi:10.21203/rs.3.rs-944849/v1), 2021-10-18
Supplement: Supplementary file 15 [file e5ed6064fe6b3207afedf9a5.xlsx]

## Sheet: Table1
Genus	Montipora						Astreopora		Acropora
Species	M. cactus	M. cactus	M. efflorescens	M. efflorescens	M. capitata	M. capitata	A. myriophthalma	A. myriophthalma	A. tenuis	A. millepora*1
References	This study	Shinzato et al. 2021	This study	Shinzato et al. 2021	Shumaker et al. 2019	Helmkampf et al. 2019	This study	Shinzato et al. 2021	Shinzato et al. 2021	Ying et al. 2019
Genome assembly
Assembly length	640828888	652728006	630535801	643312941	885704498	614509607	373403447	373403447	403090051	386599652
No. of scaffolds	3532	4925	3589	5162	3043	27865	1149	1149	1538	3869
N50	938091	898511	1168433	1132316	540623	185537	1634277	1634277	1165818	494532
Genes
No. of protein coding genes	29158	21983	29424	21370	63227	36691	23801	27576	22905	23710
Avg. length	12905	15343	12546	15531	6,507*2	4,048*2	9550	5503*2	10298	9294
Transcripts
Avg. no. of CDS (exon) per gene	6.6 (7.2)	7.7 (7.9)	6.5 (7.1)	7.8 (8.0)	4.5 (NA)	3.62 (NA)	6.0 (6.4)	5.0 (NA)	7.2 (8.1)	7.2 (7.5)
Avg. CDS (exon) length per gene (bp)	1,411 (2,033)	1,871 (2,139)	1,390 (1,994)	1,876 (2,143)	1162 (NA)	1103 (NA)	1,647 (2,132)	1,426 (NA)	1,562 (2,383)	1,600 (2,404)
Avg. CDS (exon) length	215 (280)	244 (271)	215 (280)	241 (270)	259 (NA)	305 (NA)	230 (279)	283 (NA)	216 (294)	312 (317)
Tortal CDS (exon) length (Mbp)	41 (59)	41 (45)	41 (59)	40 (44)	73 (NA)	40 (NA)	42 (54)	41 (NA)	36 (55)	38 (57)
BUSCO completeness (v5.0)
Complete	0.933	0.879	0.912	0.841	93.4%*2	64.2%*2	0.945	78.4%*2	0.929	0.947
Single-copy	0.925	0.873	0.898	0.836	75.1%*2	63.7%*2	0.932	77.7%*2	0.922	0.937
Duplicated	0.008	0.006	0.014	0.005	18.3%*2	0.5%*2	0.013	0.7%*2	0.007	0.01
Fragmented	0.041	0.057	0.045	0.072	4.1%*2	13.5%*2	0.031	7.7%*2	0.029	0.027
Missing	0.026	0.064	0.043	0.087	2.5%*2	2.5%*2	0.024	13.9%*2	0.042	0.026
*1 RefSeq assembly (GCF_004143615.1) was used for the analysis.
*2 CDS were used for the calculation.
